# Supplementary material
Source: PubMed Central journal article supplement (PMC8222105)
Supplement: NIHMS1681817-supplement-Supplement.pdf [file NIHMS1681817-supplement-Supplement.pdf]

Original research

# Respiratory exacerbations are associated with muscle loss in current and former smokers

Stefanie Elizabeth Mason <sup>1</sup>, Rafael Moreta-Martinez,<sup>2</sup> Wassim W Labaki,<sup>3</sup> Matthew Strand,<sup>4</sup> David Baraghoshi,<sup>4</sup> Elizabeth A Regan,<sup>5</sup> Jessica Bon,<sup>6</sup> Ruben San Jose Estepar,<sup>2</sup> Richard Casaburi,<sup>7</sup> Merry-Lynn N McDonald,<sup>8</sup> Harry Rossiter,<sup>7</sup> Barry J Make,<sup>9</sup> Mark T Dransfield,<sup>8</sup> MeiLan K Han,<sup>3</sup> Kendra A Young,<sup>10</sup> Greg Kinney,<sup>10</sup> John E Hokanson,<sup>10</sup> Raul San Jose Estepar,<sup>2</sup> George R Washko,<sup>1</sup> COPDGene Investigators

► Additional material is published online only. To view, please visit the journal online (<http://dx.doi.org/10.1136/thoraxjnl-2020-215999>).

For numbered affiliations see end of article.

## Correspondence to

Dr Stefanie Elizabeth Mason, Division of Pulmonary and Critical Care, Brigham and Women's Hospital, Boston, MA 02115, USA; [smason8@bwh.harvard.edu](mailto:smason8@bwh.harvard.edu)

Received 18 August 2020  
Revised 30 November 2020  
Accepted 21 December 2020

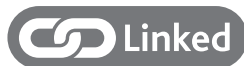

► <http://dx.doi.org/10.1136/thoraxjnl-2020-216647>

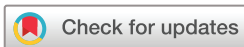

© Author(s) (or their employer(s)) 2021. No commercial re-use. See rights and permissions. Published by BMJ.

**To cite:** Mason SE, Moreta-Martinez R, Labaki WW, *et al.* *Thorax* Epub ahead of print: [please include Day Month Year]. doi:10.1136/thoraxjnl-2020-215999

## ABSTRACT

**Objectives** Muscle wasting is a recognised extra-pulmonary complication in chronic obstructive pulmonary disease and has been associated with increased risk of death. Acute respiratory exacerbations are associated with reduction of muscle function, but there is a paucity of data on their long-term effect. This study explores the relationship between acute respiratory exacerbations and long-term muscle loss using serial measurements of CT derived pectoralis muscle area (PMA).

**Design and setting** Participants were included from two prospective, longitudinal, observational, multicentre cohorts of ever-smokers with at least 10 pack-year history.

**Participants** The primary analysis included 1332 (of 2501) participants from Evaluation of COPD Longitudinally to Identify Predictive Surrogate Endpoints (ECLIPSE) and 4384 (of 10 198) participants from Genetic Epidemiology of COPD (COPDGene) who had complete data from their baseline and follow-up visits.

**Interventions** PMA was measured on chest CT scans at two timepoints. Self-reported exacerbation data were collected from participants in both studies through the use of periodic longitudinal surveys.

**Main outcome measures** Age-related and excess muscle loss over time.

**Results** Age, sex, race and body mass index were associated with baseline PMA. Participants experienced age-related decline at the upper end of reported normal ranges. In ECLIPSE, the exacerbation rate over time was associated with an excess muscle area loss of 1.3% (95% CI 0.6 to 1.9,  $p < 0.001$ ) over 3 years and in COPDGene with an excess muscle area loss of 2.1% (95% CI 1.2 to 2.8,  $p < 0.001$ ) over 5 years. Excess muscle area decline was absent in 273 individuals who participated in pulmonary rehabilitation.

**Conclusions** Exacerbations are associated with accelerated skeletal muscle loss. Each annual exacerbation was associated with the equivalent of 6 months of age-expected decline in muscle mass. Ameliorating exacerbation-associated muscle loss represents an important therapeutic target.

## INTRODUCTION

Sarcopenia is defined as an age-related loss of skeletal muscle mass and function and is closely linked

## Key messages

### What is the key question?

► Are respiratory exacerbations associated with chronic muscle loss in ever-smokers?

### What is the bottom line?

► Each annual exacerbation is associated with excess muscle loss equivalent to 6 months of age-related decline.

### Why read on?

► Muscle wasting is noted across the spectrum of obstructive lung disease severity and is associated with increased risk of death; finding and addressing potential drivers represents an important therapeutic avenue.

to frailty.<sup>1</sup> Over age 40, healthy adults lose muscle mass at a rate of 0.64%–0.7% per year for women and 0.8%–0.98% per year for men.<sup>2,3</sup> Chronic disease can accelerate sarcopenia through inflammation, metabolic derangement, hospitalisation and activity reduction.<sup>4,5</sup>

There is an extensive body of literature demonstrating increased rates of sarcopenia in persons with COPD, but muscle wasting is not universal.<sup>5–8</sup> van den Borst and colleagues found lower baseline fat free mass, but no difference in the rate of decline in fat free mass over 8 years of follow-up when comparing smokers with obstructive lung disease to smokers without obstruction.<sup>9</sup> In the acute setting, respiratory events are associated with reductions in muscle function.<sup>10,11</sup> Hopkinson and colleagues demonstrated subacute persistence of muscle volume loss at 1 year in those with two or more exacerbations in that period.<sup>12</sup> These data suggest that respiratory events may contribute to chronic muscle wasting in smokers, but there is a paucity of longitudinal data to examine the durability of these effects.

Several methods for quantitatively measuring muscle mass have been endorsed in international guidelines including dual-energy X-ray absorptiometry, bioelectrical impedance analysis (BIA) and CT.<sup>1</sup> Pectoralis muscle area (PMA), unlike lumbar, psoas

or thigh muscle area, can be derived from routine chest CT. In patients with COPD, PMA correlates well with the whole-body fat free mass index derived from BIA and is more closely associated with mortality than body mass index (BMI).<sup>13–17</sup>

Using baseline and 3-year or 5-year follow-up data from the Evaluation of COPD Longitudinally to Identify Predictive Surrogate Endpoints (ECLIPSE) and Genetic Epidemiology of COPD (COPDGene) studies, we sought to identify the relationship between respiratory exacerbation rate over time and long-term muscle loss. We hypothesised that higher rates of respiratory exacerbation would be associated with an accelerated loss of skeletal muscle beyond what would be expected with age in ever smokers with and without COPD.

## METHODS

### Study population

The study populations used in our analysis were derived from two previously described multicentre, longitudinal, observational, cohort studies. The ECLIPSE (NCT00292552, SCO104960) study enrolled 2164 COPD patients and 337 controls, aged 45–75, with a smoking history of at least 10 pack years.<sup>18</sup> Participants were enrolled from 26 centres across 12 countries and followed for a total of 3 years with assessments completed at baseline, 12 months and 36 months. For our primary analysis, we included those subjects who had complete data for both their baseline and 36-month visits.

The COPDGene study (NCT00608764) is ongoing and has enrolled 10 198 non-Hispanic White or African American ever smokers with and without COPD, aged 45–80, with a history of at least 10 pack years of smoking.<sup>19</sup> Enrolment occurred at 21 centres in the USA with assessments every 5 years; the 10-year follow-up visit is ongoing. Our primary analysis used data from those participants with complete data for their baseline and year 5 visits.

### Assessments

Both studies collected self-reported acute respiratory event data at each visit and between visits. Study visits were delayed if a patient was currently having an event. COPDGene participants were contacted every 6 months by telephone or web systems and ECLIPSE participants were contacted monthly by telephone.<sup>18 20</sup> In both studies, an acute respiratory event (hereafter referred to as an exacerbation) was considered to be an increase in respiratory symptoms requiring antibiotics or systemic steroids; a severe event was one that required emergency department evaluation or hospitalisation.<sup>18 19</sup> For each participant, the number of reported events was divided by the observed follow-up time to generate an annualised exacerbation rate.

Spirometry was obtained at baseline and each follow-up visit in both studies, before and after the administration of an inhaled short-acting beta agonist. Expiratory airflow obstruction was defined spirometrically by the presence of a post-bronchodilator FEV<sub>1</sub>/FVC ratio of less than 0.7. Additional categorisation of disease severity was performed based on decrements in the FEV<sub>1</sub>. COPD was defined as those with Global Initiative for Chronic Obstructive Lung Disease (GOLD) stage 2 or higher disease (ie, FEV<sub>1</sub> per cent predicted <0.8).<sup>21</sup> Ever smokers without obstruction and those with an FEV<sub>1</sub>/FVC ratio less than 0.7, but an FEV<sub>1</sub> >80% of predicted (GOLD 1), were categorised as ‘at risk’.

Six-minute walk testing was completed according to international guidelines at study visits for all participants in COPDGene and in participants diagnosed with COPD in ECLIPSE.<sup>22</sup>

The minimum clinically important change in distance on serial testing was taken as 30 m.<sup>23</sup>

Participants in both studies underwent CT scanning of the chest at full inflation at each in-person visit.<sup>18 19</sup> Quantitative assessments of the PMA were obtained as described previously from a single axial slice of the CT scan above the aortic arch.<sup>24 25</sup> Each resulting segmentation was reviewed for quality control and segmentation failures (eg, malposition of the arm, distortion from an implanted device) were visually identified and excluded. The calculated PMA reported for each scan was expressed in cm<sup>2</sup> and represented the aggregate cross-sectional area of the right and left pectoralis major and minor muscles.

### Statistical analyses

Models were checked for normality of residuals, homoscedasticity and multicollinearity. When the 154 observations with residuals more than 2.5 SD away from the residuals mean were excluded, the effect estimates and CIs did not change. Variance inflation factors were between 1 and 2 for all covariates. Histogram and quantile-quantile plots revealed the distribution of the PMA values to be non-normal. Linear mixed effects models were used to fit the log-transform of PMA longitudinally. Primary predictors of interest in these models included phase of study (baseline or follow-up), annual exacerbation rate, and their interaction. The PMA loss associated with the interaction term is described as ‘excess loss’. Additional time-invariant covariates were race, sex and smoking history on enrolment (measured in pack years); time dependent covariates included age, BMI, chronic oral steroid use and current smoking status. Covariates were selected a priori as potential confounders of the relationship between exacerbations and PMA or their role as independent predictors of the outcome of interest. Repeated measures were accounted for by including random intercepts for subjects, which induced a compound symmetric covariance structure on the repeated measures. The Satterthwaite method for df was used to obtain p values for fixed effects.<sup>26</sup> CIs were generated by the Wald method. Annual severe exacerbation rate and its effect on PMA was similarly and separately modelled. GOLD stage and participation in intercurrent pulmonary rehabilitation (PR) were explored as model covariates in separate, exploratory models.

Study participants were then divided into quintiles of per cent PMA decline, with quintile 0 representing those whom gained PMA and quintile 5 representing the largest decline over the study interval. The Kruskal-Wallis test was used to assess for differences in distribution of 6 min walk distance and BMI across quintiles. The Fisher exact test was used to assess for differences in the per cent of participants with a minimum clinically important gain or loss in 6 min walk distance across quintiles.

To account for bias due to missing data, we repeated the analysis in both cohorts including participants with complete data for only one of the time points, which we term the expanded cohort. For more details, see online supplemental file 1. All analyses were performed using R V.3.5.1, with longitudinal models using the lme4 and lmerTest packages.

## RESULTS

For the primary analysis, 1332 participants from ECLIPSE and 4384 participants from COPDGene had complete data for the baseline and follow-up visits (figure 1A,B, respectively). Baseline clinical characteristics of the cohorts are shown in table 1. The ECLIPSE cohort was 63.6% men, 97.7% non-Hispanic White, had a mean PMA of 36.6 cm<sup>2</sup> (±10.9), and 0.5% of the participants reported using chronic oral steroids. The COPDGene

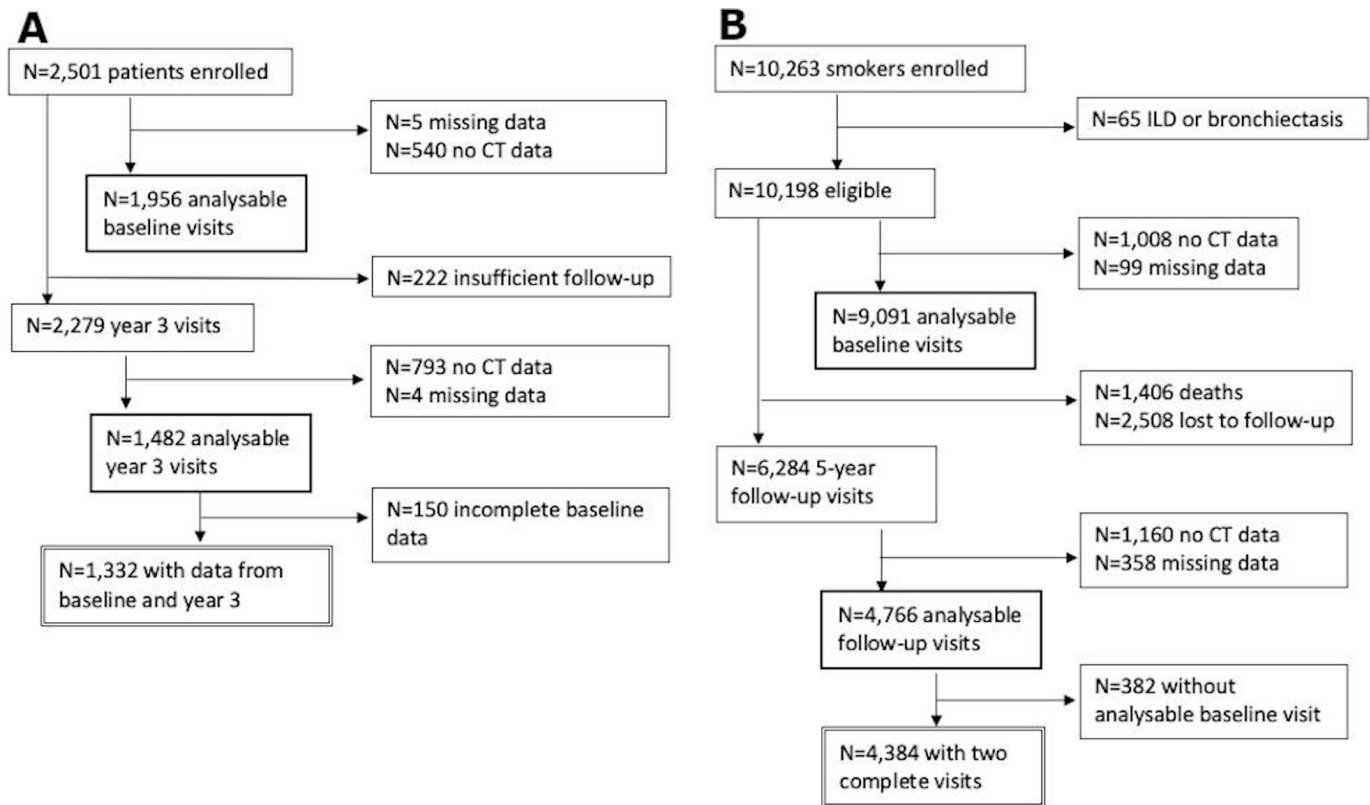

**Figure 1** Consort diagram. (A) Evaluation of COPD Longitudinally to Identify Predictive Surrogate Endpoints cohort; (B) Genetic Epidemiology of COPD cohort. ILD, interstitial lung disease.

cohort was 50.5% men, 70.6% non-Hispanic White, had a mean PMA of 41.3 cm<sup>2</sup> ( $\pm 15.3$ ), and 1.5% of the participants reported using chronic oral steroids.

Exacerbations were common in both cohorts prior to enrolment as well as during the intercurrent follow-up interval (table 1). In the 12 months preceding study entry, 45.9% of participants in ECLIPSE and 20.5% of participants in COPDGene reported at least one exacerbation, with 15.3% and 4.6% reporting at least one severe exacerbation, respectively. During the follow-up interval, 59% of ECLIPSE participants and 39.9% of COPDGene participants reported at least one exacerbation, with 21.0% and 17.4% reporting at least one severe exacerbation, respectively.

In the mixed models for both cohorts, age ( $p < 0.001$ ), sex ( $p < 0.001$ ), BMI ( $p < 0.001$ ) and race (ECLIPSE  $p = 0.004$ , COPDGene  $p < 0.001$ ) were significant correlates of PMA. Men and women experienced age-related decline at the upper end of reported normal ranges. Women lost 0.8% (95% CI 0.6 to 1.0,  $p < 0.001$ ) and 0.8% (95% CI 0.7 to 0.9,  $p < 0.001$ ) of their PMA annually in ECLIPSE and COPDGene, respectively while men lost 1.0% (95% CI 0.8 to 1.2,  $p < 0.001$ ) and 1.0% (95% CI 0.9 to 1.1,  $p < 0.001$ ) of their PMA annually in the ECLIPSE and COPDGene cohorts, respectively.

The exacerbation rate by time interaction was associated with a statistically significant excess PMA loss. In ECLIPSE, an annual exacerbation rate of one per year was associated with an excess loss of 1.3% (95% CI 0.6 to 1.9,  $p < 0.001$ ) over 3 years. The severe exacerbation rate by time interaction was associated with an excess PMA loss of 2.6% (95% CI 1.2 to 4.0,  $p < 0.001$ ) over that same time period. In COPDGene, an exacerbation rate of one per year was associated with an excess loss of 2.1% (95% CI 1.2 to 2.8,  $p < 0.001$ ) over 5 years. An equivalent severe

exacerbation rate was associated with an excess PMA loss of 2.9% (95% CI 1.1 to 4.8,  $p = 0.002$ ) over that same time period (figure 2).

The exacerbation rate by time interaction in women was associated with an excess PMA loss of 1.1% (95% CI 0.1 to 2.2,  $p = 0.043$ ) in ECLIPSE and 1.8% (95% CI 0.8 to 2.9,  $p = 0.001$ ) in COPDGene, compared with 1.4% (95% CI 0.6 to 2.2,  $p < 0.001$ ) in ECLIPSE and 2.6% (95% CI 1.4 to 4.0,  $p < 0.001$ ) in COPDGene for men (figure 2).

In both the at-risk and COPD groups, the exacerbation by time interaction was associated with excess loss of PMA (figure 2). In participants with COPD, an annual exacerbation rate of one per year was associated with a 0.7% (95% CI 0 to 1.4,  $p = 0.050$ ) excess loss of PMA in ECLIPSE and 1.5% (95% CI 0.3 to 2.6,  $p = 0.017$ ) in COPDGene. In participants at-risk, an effect estimate could not be calculated for those in ECLIPSE due to their low rates of exacerbation (online supplemental table 2), but for those in COPDGene, an annual exacerbation rate of one per year was associated with a 1.9% (95% CI 0.7 to 3.1,  $p = 0.002$ ) excess loss of PMA.

When included as a fixed effect in the model, GOLD stage was negatively associated with PMA ( $p = 0.062$  for GOLD 1 in COPDGene and  $p < 0.001$  for each GOLD 2–4 stage in both studies). When included as a fixed effect, intercurrent PR was also a significant predictor of PMA ( $p = 0.001$ ) in the COPDGene cohort. In the group whom attended PR ( $n = 273$ ), there was no significant excess decline in PMA ( $-0.2\%$ , 95% CI  $-2.2$  to  $2.5$ ,  $p = 0.882$ ) attributable to the exacerbation by time interaction despite a mean annual exacerbation rate of 1.0.

Participants whose PMA decreased over time had a corresponding decrease in BMI ( $p < 0.001$  for both cohorts, table 2). Greater decreases in PMA were not associated with changes in



**Table 1** Clinical characteristics of the cohorts

|                                                  | ECLIPSE       | COPDGene      |
|--------------------------------------------------|---------------|---------------|
| <b>Baseline characteristics</b>                  |               |               |
| Sample size                                      | 1332          | 4384          |
| Age, years (mean, SD)                            | 61.8 (7.9)    | 59.8 (8.6)    |
| Male (n, %)                                      | 847 (63.6)    | 2214 (50.5)   |
| Caucasian (n, %)                                 | 1302 (97.7)   | 3093 (70.6)   |
| Current smoker (n, %)                            | 512 (38.4)    | 2122 (48.4)   |
| Pack years on study entry (mean, SD)             | 45.8 (27.5)   | 42.8 (23.8)   |
| BMI (mean, SD)                                   | 26.5 (5.1)    | 29.1 (5.9)    |
| Chronic oral steroid use (n, %)                  | 7 (0.5)       | 64 (1.5)      |
| Pectoral muscle area, cm <sup>2</sup> (mean, SD) | 36.6 (10.9)   | 41.3 (15.3)   |
| 6-minute walk distance, m (mean, SD)             | 386.4 (118.3) | 434.7 (113.1) |
| <b>Baseline exacerbation history</b>             |               |               |
| An event in past year (%)                        | 45.9          | 20.5          |
| Mean rate, per year                              | 0.93          | 0.33          |
| A severe event in past year (%)                  | 15.3          | 4.6           |
| Mean severe rate, per year                       | 0.25          | 0.06          |
| <b>Intercurrent exacerbation history</b>         |               |               |
| An event during follow-up (%)                    | 59.0          | 39.9          |
| ≥1 event per year (%)                            | 41.7          | 11.7          |
| Mean rate, per year                              | 0.94          | 0.33          |
| A severe event during follow-up (%)              | 21.0          | 17.4          |
| ≥1 severe event per year (%)                     | 7.7           | 2.4           |
| Mean severe rate, per year                       | 0.19          | 0.09          |

Baseline exacerbation history represents participants' self-reported 12-month exacerbation frequency at study enrolment. Intercurrent exacerbations are those that occurred during the study and were assessed using periodic surveys during the study follow-up period. These data are available by Global Initiative for Chronic Obstructive Lung Disease stage in online supplemental tables E1 and E2. BMI, body mass index; COPDGene, Genetic Epidemiology of COPD; ECLIPSE, Evaluation of COPD Longitudinally to Identify Predictive Surrogate Endpoints.

6 min walk distance as measured by median per cent change ( $p=0.379$  in ECLIPSE,  $p=0.363$  in COPDGene), per cent gaining 30 m or more metres ( $p=0.965$  in ECLIPSE,  $p=0.738$  in COPDGene) or per cent losing 30 m or more metres ( $p=0.332$  in ECLIPSE,  $p=0.520$  in COPDGene, [table 3](#)).

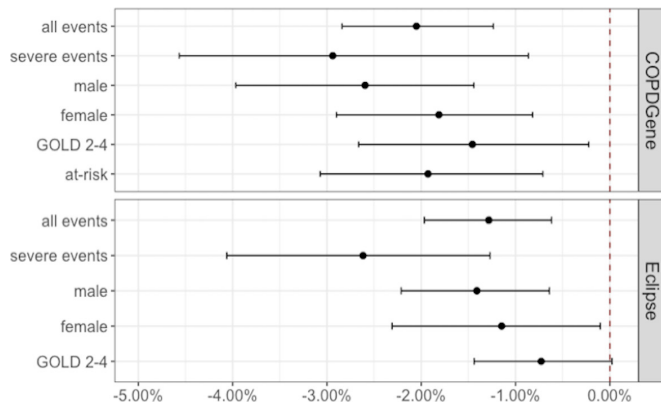

**Figure 2** Estimated excess per cent loss of pectoral muscle area per annual exacerbation. The 1332 participants from ECLIPSE were followed for 3 years and the 4384 participants in COPDGene were followed for 5 years. The dot represents the effect estimate for excess per cent muscle loss and the whiskers correspond to the 95% CI. COPDGene, Genetic Epidemiology of COPD; ECLIPSE, Evaluation of COPD Longitudinally to Identify Predictive Surrogate Endpoints; GOLD, Global Initiative for Chronic Obstructive Lung Disease.

**Table 2** Percent change in pectoral muscle area and BMI by quintile of PMA loss

| Quintile of PMA decline | n   | ECLIPSE             |                     | COPDGene            |                     |      |
|-------------------------|-----|---------------------|---------------------|---------------------|---------------------|------|
|                         |     | Median % change PMA | Median % change BMI | Median % change PMA | Median % change BMI |      |
| 0                       | 503 | 8.2                 | 0.8                 | 1516                | 9.4                 | 1.8  |
| 1                       | 166 | -2.1                | -0.3                | 574                 | -2.5                | 0.1  |
| 2                       | 166 | -6.3                | -1.3                | 574                 | -7.6                | 0.1  |
| 3                       | 166 | -9.7                | -2.5                | 573                 | -12.5               | -1.4 |
| 4                       | 166 | -14.7               | -2.2                | 574                 | -18.6               | -1.2 |
| 5                       | 165 | -22.4               | -2.6                | 573                 | -27.9               | -3.9 |

The 0th quintile represents those subjects who had an increase in their PMA during the study. BMI, body mass index; COPDGene, Genetic Epidemiology of COPD; ECLIPSE, Evaluation of COPD Longitudinally to Identify Predictive Surrogate Endpoints; PMA, pectoral muscle area.

**DISCUSSION**

The results of this longitudinal study in two observational cohorts demonstrate that acute respiratory exacerbations are associated with accelerated loss of skeletal muscle cross-sectional area over 3-year and 5-year periods of observation. The association was present in both men and women, as well as both those diagnosed with COPD, and current and former smokers at risk for COPD. In annualised terms, our data suggest that for each exacerbation, a person loses the equivalent of 6 months of age-related pectoral muscle area. That is, a person who has one exacerbation per year would be expected to lose 1.5 times their age-expected muscle area and a person who has two exacerbations per year would lose two times their age expected muscle area in that year.

Our findings extend and reinforce the conclusions of Hopkinson and colleagues who found that persons with two or more exacerbations in 1 year of follow-up had a larger decrease in fat free mass.<sup>12</sup> Two or more exacerbations in 12 months allows little recovery time, making their described change in body composition potentially attributable to the acute effect of those exacerbations. By observing participants for multiple years, our study demonstrates a persistent decrement despite periods of intercurrent stability and provides a potential explanation as to why people with COPD may have accelerated muscle loss.

Similar to van den Borst and colleagues, we found that persons with COPD had lower baseline muscle mass than those without obstruction. However, van den Borst found no difference in the body composition trajectories over 8 years comparing participants with COPD to smoking controls.<sup>9</sup> Their study did not report data on exacerbations and had only 260 obstructive lung disease participants, of whom one third were GOLD stage 1. It is possible that their cohort had a low exacerbation frequency, which limited their power to detect differences attributable to exacerbations. Taken in concert, our two studies suggest that exacerbations are a potential mechanism for accelerated decline in muscle mass and that absence of exacerbations could result in a body composition trajectory similar to that of non-obstructed individuals.

Exercise programmes, such as PR, are the most widely available, recommended intervention in persons with skeletal muscle dysfunction.<sup>1 27 28</sup> Exercise programmes improve skeletal muscle function and increase muscle mass in the short-term.<sup>8 29-31</sup> For the small number of people in this study whom underwent intercurrent PR, there was no association between exacerbations over time and PMA. This raises the possibility that PR attenuates the effect of exacerbations on the skeletal musculature; however, replication in a larger cohort is necessary to confirm this hypothesis. PR immediately following exacerbations may be of



**Table 3** Changes in 6 min walk testing by quintile of PMA loss

| Quintile of PMA decline | ECLIPSE* |                              |                   |                   | COPDGene† |                              |                   |                   |
|-------------------------|----------|------------------------------|-------------------|-------------------|-----------|------------------------------|-------------------|-------------------|
|                         | n        | Median % change 6MW distance | % with ≥30 m gain | % with ≥30 m loss | n         | Median % change 6MW distance | % with ≥30 m gain | % with ≥30 m loss |
| 0                       | 357      | -3.1                         | 25.5              | 42.3              | 1482      | -8.2                         | 22.3              | 53.8              |
| 1                       | 113      | -2.8                         | 26.5              | 39.8              | 560       | -9.2                         | 20.2              | 54.1              |
| 2                       | 121      | -2.2                         | 24.0              | 37.2              | 561       | -5.8                         | 22.3              | 49.5              |
| 3                       | 136      | -3.4                         | 23.5              | 39.0              | 559       | -7.3                         | 23.1              | 53.1              |
| 4                       | 121      | -3.6                         | 26.4              | 38.0              | 556       | -8.1                         | 24.1              | 54.1              |
| 5                       | 131      | -5.9                         | 22.1              | 49.6              | 560       | -9.4                         | 22.7              | 54.5              |

The 0th quintile represents those subjects who had an increase in their PMA during the study.

\*N=353 subjects from ECLIPSE did not have 6 min walk data available.

†N=106 subjects from COPDGene did not have 6 min walk data available.

COPDGene, Genetic Epidemiology of COPD; ECLIPSE, Evaluation of COPD Longitudinally to Identify Predictive Surrogate Endpoints; 6MW, 6 min walk; PMA, pectoral muscle area.

particular benefit; multiple studies have demonstrated improvement in 1-year mortality when PR was initiated within 90 days of hospital discharge.<sup>32 33</sup> Unfortunately, long-term mortality has not shown a similar improvement, which may be related to the inconsistency with which PR results in sustained increases in physical activity.<sup>29 32 34</sup>

Surprisingly, those individuals with the greatest percentage of PMA loss did not have reduced performance on 6 min walk testing compared with those with little or no PMA loss (table 3). This may reflect the fact that the 6 min walk is a submaximal test and is more akin to a test of functional performance rather than a test of endurance exercise capacity or force generation. Muscle weakness does manifest predominantly in the lower limbs; however, a disconnect between skeletal muscle mass and quadriceps weakness has also been previously described.<sup>5 8 35</sup> This underscores the point that low muscle mass does not necessarily equate to muscle weakness and that a test of functional performance is not necessarily a strong correlate of muscle mass. Similarly, following BMI clinically would underestimate the impact on muscle mass, as we found the change in skeletal muscle area to be 10-fold the change in BMI (table 2). Identifying and potentially intervening in those patients with muscle mass loss, regardless of BMI or physical performance, is important, however, as muscle wasting is demonstrated to carry a poor prognosis.<sup>13 36–38</sup> Indeed, weight loss, even in the absence of low BMI, is associated with increased mortality in COPD, likely because it often represents loss of muscle, rather than fat, mass.<sup>39</sup>

Strengths of our study include the replicability in two large, multicentre cohorts, our longitudinal model design, and our examination of both muscle mass and function. The smaller effect estimates reported for the ECLIPSE cohort are likely a reflection of the shorter duration of follow-up: 3 years in ECLIPSE compared with 5 years in COPDGene, given the annualised effects were consistent between cohorts. While loss to follow-up presents a concern for bias in our results, our expanded analysis using partial data and application of inverse probability weighting methods suggest that missing data did not alter estimates notably (see online supplemental file 1).

Other limitations to our investigation include lack of data on physical activity, having only two time points, and lack of causal inference. Due to the long time intervals used, we could not observe acute muscle decrement associated with exacerbations and the potential mechanism of incomplete recovery remains a hypothesis. The low exacerbation rate in the at-risk subjects in the ECLIPSE cohort prevented us from replicating the effect noted in the at-risk subjects in the COPDGene cohort. Nonetheless, fat free mass index has been previously associated

with higher risk of exacerbations in ECLIPSE, corroborating our findings.<sup>40</sup> The true effect on those at-risk or with mild disease is of interest not only for the possibility of early intervention, but because lung function decline was most prominent in GOLD stage 1 participants in a recent longitudinal analysis of the COPDGene cohort.<sup>41</sup> Further, all of the exacerbation data was self-reported, which introduces recollection bias, especially in the baseline data in which subjects were asked to recall the prior 12 months. Subjects in COPDGene were contacted every 6 months, compared with monthly in ECLIPSE, which may have resulted in relative under-reporting of exacerbations in the COPDGene cohort.

In summary, we used clinical and radiological data from two cohorts of patients at risk for, or diagnosed with, COPD to demonstrate an association between exacerbation rate over time and an accelerated loss of skeletal muscle. Neither BMI nor 6 min walk performance reflected the degree of skeletal muscle loss. CT phenotyping could prove to be a useful methodology for assessing body composition as many patients already undergo imaging scans for lung cancer screening or clinical concerns. Further work is needed to determine whether PR attenuates muscle loss and whether intervention to preserve muscle mass can alter prognosis.

#### Author affiliations

<sup>1</sup>Division of Pulmonary and Critical Care, Brigham and Women's Hospital, Boston, Massachusetts, USA

<sup>2</sup>Department of Radiology, Brigham and Women's Hospital, Boston, Massachusetts, USA

<sup>3</sup>Division of Pulmonary and Critical Care Medicine, University of Michigan, Ann Arbor, Michigan, USA

<sup>4</sup>Division of Biostatistics and Bioinformatics, National Jewish Health, Denver, Colorado, USA

<sup>5</sup>Division of Rheumatology, National Jewish Health, Denver, Colorado, USA

<sup>6</sup>Division of Pulmonary, Allergy and Critical Care, UPMC, Pittsburgh, Pennsylvania, USA

<sup>7</sup>Division of Respiratory and Critical Care Physiology and Medicine, Los Angeles Biomedical Research Institute, Torrance, California, USA

<sup>8</sup>Division of Pulmonary, Allergy, and Critical Care, University of Alabama at Birmingham, Birmingham, Alabama, USA

<sup>9</sup>Division of Pulmonary, Critical Care, and Sleep Medicine, National Jewish Health, Denver, Colorado, USA

<sup>10</sup>Department of Epidemiology, Colorado School of Public Health, Aurora, Colorado, USA

**Twitter** Stefanie Elizabeth Mason @stef\_mason

**Collaborators** James D. Crapo (Administrative Center), Edwin K. Silverman (Administrative Center), Barry J. Make (Administrative Center), Elizabeth A. Regan (Administrative Center), Terri Beaty (Genetic Analysis Center), Ferdouse Begum (Genetic Analysis Center), Peter J. Castaldi (Genetic Analysis Center), Michael Cho (Genetic Analysis Center), Dawn L. DeMeo (Genetic Analysis Center), Adel R. Boueiz

(Genetic Analysis Center), Marilyn G. Foreman (Genetic Analysis Center), Eitan Halper-Stromberg (Genetic Analysis Center), Lystra P. Hayden (Genetic Analysis Center), Craig P. Hersh (Genetic Analysis Center), Jacqueline Hetmanski (Genetic Analysis Center), Brian D. Hobbs (Genetic Analysis Center), John E. Hokanson (Genetic Analysis Center), Nan Laird (Genetic Analysis Center), Christoph Lange (Genetic Analysis Center), Sharon M. Lutz (Genetic Analysis Center), Merry-Lynn McDonald (Genetic Analysis Center), Margaret M. Parker (Genetic Analysis Center), Dmitry Prokopenko (Genetic Analysis Center), Dandi Qiao (Genetic Analysis Center), Elizabeth A. Regan (Genetic Analysis Center), Phuwawat Sakornsakolpat (Genetic Analysis Center), Edwin K. Silverman (Genetic Analysis Center), Emily S. Wan (Genetic Analysis Center), Sungho Won (Genetic Analysis Center), Juan Pablo Centeno (Imaging Center), Jean-Paul Charbonnier (Imaging Center), Harvey O. Coxson (Imaging Center), Craig J. Galban (Imaging Center), MeiLan K. Han (Imaging Center), Eric A. Hoffman (Imaging Center), Stephen Humphries (Imaging Center), Francine L. Jacobson (Imaging Center), Philip F. Judy (Imaging Center), Ella A. Kazerooni (Imaging Center), Alex Kluiber (Imaging Center), David A. Lynch (Imaging Center), Pietro Nardelli (Imaging Center), John D. Newell, Jr. (Imaging Center), Aleena Notary (Imaging Center), Andrea Oh (Imaging Center), Elizabeth A. Regan (Imaging Center), James C. Ross (Imaging Center), Raul San Jose Estepar (Imaging Center), Joyce Schroeder (Imaging Center), Jered Sieren (Imaging Center), Berend C. Stoel (Imaging Center), Juerg Tschirren (Imaging Center), Edwin Van Beek (Imaging Center), Bram van Ginneken (Imaging Center), Eva van Rikxoort (Imaging Center), Gonzalo Vegas Sanchez-Ferrero (Imaging Center), Lucas Veitel (Imaging Center), George R. Washko (Imaging Center), Carla G. Wilson (Imaging Center), Robert Jensen (PFT QA Center), Douglas Everett (Data Coordinating Center and Biostatistics, National Jewish Health), Jim Crooks (Data Coordinating Center and Biostatistics, National Jewish Health), Katherine Pratte (Data Coordinating Center and Biostatistics, National Jewish Health), Matt Strand (Data Coordinating Center and Biostatistics, National Jewish Health), Carla G. Wilson (Data Coordinating Center and Biostatistics, National Jewish Health), John E. Hokanson (Epidemiology Core, University of Colorado Anschutz Medical Campus), Gregory Kinney (Epidemiology Core, University of Colorado Anschutz Medical Campus), Kendra A. Young (Epidemiology Core, University of Colorado Anschutz Medical Campus), Surya P. Bhatt (Mortality Adjudication Core), Jessica Bon, Alejandro A. Diaz (Mortality Adjudication Core), MeiLan K. Han (Mortality Adjudication Core), Barry Make (Mortality Adjudication Core), Susan Murray (Mortality Adjudication Core), Elizabeth Regan (Mortality Adjudication Core), Xavier Soler (Mortality Adjudication Core), Carla G. Wilson (Mortality Adjudication Core), Russell P. Bowler (Biomarker Core), Katerina Kechris (Biomarker Core), Farnoush Banaei-Kashani (Biomarker Core), Jeffrey L. Curtis, Perry G. Pernicano, Nicola Hanania (Baylor College of Medicine), Mustafa Atik (Baylor College of Medicine), Aladin Boriek (Baylor College of Medicine), Kalpatha Guntupalli (Baylor College of Medicine), Elizabeth Guy (Baylor College of Medicine), Amit Parulekar (Baylor College of Medicine), Dawn L. DeMeo (Brigham and Women's Hospital), Alejandro A. Diaz (Brigham and Women's Hospital), Lystra P. Hayden (Brigham and Women's Hospital), Brian D. Hobbs (Brigham and Women's Hospital), Craig Hersh (Brigham and Women's Hospital), Francine L. Jacobson (Brigham and Women's Hospital), George Washko (Brigham and Women's Hospital), R. Graham Barr (Columbia University), John Austin (Columbia University), Belinda D'Souza (Columbia University), Byron Thomashow (Columbia University), Neil MacIntyre (Duke University Medical Center), H. Page McAdams (Duke University Medical Center), Lacey Washington (Duke University Medical Center), Eric Flenaugh (Grady Memorial Hospital), Silanth Terpenning (Grady Memorial Hospital), Charlene McEvoy (HealthPartners Research Institute), Joseph Tashjian (HealthPartners Research Institute), Robert Wise (Johns Hopkins University), Robert Brown (Johns Hopkins University), Nadia N. Hansel (Johns Hopkins University), Karen Horton (Johns Hopkins University), Allison Lambert (Johns Hopkins University), Nirupama Putcha (Johns Hopkins University), Richard Casaburi (Lundquist Institute for Biomedical Innovation Harbor UCLA Medical Center), Alessandra Adami (Lundquist Institute for Biomedical Innovation Harbor UCLA Medical Center), Matthew Budoff (Lundquist Institute for Biomedical Innovation Harbor UCLA Medical Center), Hans Fischer (Lundquist Institute for Biomedical Innovation Harbor UCLA Medical Center), Janos Porszasz (Lundquist Institute for Biomedical Innovation Harbor UCLA Medical Center), Harry Rossiter (Lundquist Institute for Biomedical Innovation Harbor UCLA Medical Center), Michael E. DeBakey (VAMC), Amir Sharafkhaneh (VAMC), Charlie Lan (VAMC), Russell Bowler (National Jewish Health), David A. Lynch (National Jewish Health), Richard Rosiello (Reliant Medical Group), David Pace (Reliant Medical Group), Gerard Criner (Temple University), David Ciccolella (Temple University), Francis Cordova (Temple University), Chandra Dass (Temple University), Gilbert D'Alonzo (Temple University), Parag Desai (Temple University), Michael Jacobs (Temple University), Steven Kelsen (Temple University), Victor Kim (Temple University), A. James Mamary (Temple University), Nathaniel Marchetti (Temple University), Aditi Satti (Temple University), Kartik Shenoy (Temple University), Robert M. Steiner (Temple University), Alex Swift (Temple University), Irene Swift (Temple University), Maria Elena Vega-Sanchez (Temple University), Mark Dransfield (University of Alabama), William Bailey (University of Alabama), Surya P. Bhatt (University of Alabama), Anand Iyer (University of Alabama), Hrudaya Nath (University of Alabama), J. Michael Wells (University of Alabama), Douglas

Conrad (University of California), Xavier Soler (University of California), Andrew Yen (University of California), Alejandro P. Comellas (University of Iowa), Karin F. Hoth (University of Iowa), John Newell (University of Iowa), Brad Thompson (University of Iowa), MeiLan K. Han (University of Michigan), Ella Kazerooni (University of Michigan), Wassim Labaki (University of Michigan), Craig Galban (University of Michigan), Dharshan Vummaidi (University of Michigan), Joanne Billings (University of Minnesota), Abbie Begnaud (University of Minnesota), Tadashi Allen (University of Minnesota), Frank Sciruba (University of Pittsburgh), Jessica Bon (University of Pittsburgh), Divay Chandra (University of Pittsburgh), Joel Weisfeld (University of Pittsburgh), Antonio Anzueto (University of Texas Health), Sandra Adams (University of Texas Health), Diego Maselli-Caceres (University of Texas Health), Mario E. Ruiz (University of Texas Health), Harjinder Singh (University of Texas Health)

**Contributors** SEM wrote the manuscript. SEM, GRW, DB and MS were responsible for study design and statistical analysis. RM-M, RubenSJE and RaulSJE contributed to the computational imaging methodology. RM-M, WWL, MS, DB, EAR, JB, RC, M-LNM, HR, BJM, MTD, MKH, KAY, GK, JEH, RaulSJE and GRW revised the manuscript for critical intellectual content.

**Funding** This work was supported by NIH HL089856 and HL089897 and T32 HL007633 (SEM). The COPDGene (Genetic Epidemiology of COPD) project is also supported by the COPD Foundation through contributions made to an industry advisory board comprised AstraZeneca, Boehringer Ingelheim, GlaxoSmithKline, Novartis, Pfizer, Siemens and Sunovion.

**Disclaimer** The funders had no role in the study design, data collection, data analysis, data interpretation, writing of the report or the decision to publish.

**Competing interests** MTD reports grant funding from the National Institutes of Health relevant to the submitted work. Outside the submitted work, he reports grants from the American Lung Association, Department of Veterans Affairs, and the Department of Defense. He reports consulting fees from Boehringer Ingelheim, GlaxoSmithKline, AstraZeneca, PneumRx, Quark Pharmaceuticals and Mereo. He is involved in contracted clinical trials with Boehringer Ingelheim, GlaxoSmithKline, Novartis, AstraZeneca, Yungjin, PneumRx, Pulmonx, Boston Scientific, Gala and Nuaira. RC reports grant funding from the National Institutes of Health relevant to the submitted work. Outside the submitted work, he reports consulting fees or advisory board membership from Boehringer Ingelheim, GlaxoSmithKline, AstraZeneca, Abbott, Genentech and Regeneron. He is involved in contracted clinical trials with Boehringer Ingelheim, GlaxoSmithKline, AstraZeneca, Genentech and Regeneron. HR reports grant funding from the National Institutes of Health and the Tobacco Related Disease Research Program relevant to the submitted work. Outside the submitted work, he is involved in contracted clinical trials with Boehringer Ingelheim, GlaxoSmithKline, Novartis, AstraZeneca, Astellas, Genentech and Regeneron. WWL reports funding from the National Institutes of Health, non-financial support from Pulmonx, and personal fees from Konica Minolta, outside of the submitted work. MKH reports grant funding from the National Institutes of Health relevant to the submitted work. Outside the submitted work she reports grant funding from Verona, Mylan and Merck. She reports personal fees from GlaxoSmithKline, AstraZeneca and Boehringer Ingelheim. She reports other support from Novartis and Sunovion. KAY and MS report grant funding from the National Institutes of Health relevant to the submitted work. RaulSJE reports funding from the National Institutes of Health relevant to the submitted work. Outside the submitted work, he reports grants from Boehringer Ingelheim and personal fees from Leuko labs and Chiesi. He is also a founder and co-owner of Quantitative Imaging Solutions which is a company that provides image based consulting and develops software to enable data sharing. BJM reports grants from AstraZeneca, GlaxoSmithKline, Sunovion, Pearl Research and the National Heart Lung Blood Institute. He reports trial related activity from Azatrazeneca, Spiration, GlaxoSmithKline, Sunovision, Third Pole and Takeda. He reports CME related support from Mt Sinai, WebMD, National Jewish Health, American College of Chest Physicians, Projects in Knowledge, Hybrid Communications, Medscape, Ultimate Medical Academy, Eastern Pulmonary Society, Catamount Medical, Eastern Va Medical Center, Academy Continued Health Learning and Wolters Kluwer Health, from outside the submitted work. He is involved with the medical advisory board for Verona, Boehringer Ingelheim, Theravance, Circassia, Phillips, Science 24/7, AstraZeneca and GlaxoSmithKline. All activities are outside of the submitted work. GRW reports grants from the National Institutes of Health, Boehringer Ingelheim, BTG Interventional Medicine, and Janssen Pharmaceuticals. He reports consulting work for Boehringer Ingelheim, PulmonX, Janssen Pharmaceuticals, GlaxoSmithKline, Novartis, Vertex and CSL Behring. He reports advisory board involvement with Boehringer Ingelheim, Vertex and CSL Behring. He is also a founder and co-owner of Quantitative Imaging Solutions which is a company that provides image based consulting and develops software to enable data sharing. All activities are outside the submitted work.

**Patient consent for publication** Not required.

**Ethics approval** Each study was approved by the relevant Institutional Review Board(s). For a complete list of the sites and corresponding IRB approval numbers, please see online supplemental tables E4 and E5. Written informed consent was obtained from all participants.

**Provenance and peer review** Not commissioned; externally peer reviewed.

**Data availability statement** Data may be obtained from a third party and are not publicly available. Investigators can contact the data coordinating centers for each study with data requests. ECLIPSE: <https://eclipse-copd.com/COPDGene>: <http://www.copdgene.org/>

#### ORCID iD

Stefanie Elizabeth Mason <http://orcid.org/0000-0002-7649-9026>

#### REFERENCES

- Dent E, Morley JE, Cruz-Jentoft AJ, *et al.* International clinical practice guidelines for sarcopenia (ICFSR): screening, diagnosis and management. *J Nutr Health Aging* 2018;22:1148–61.
- Wilkinson DJ, Piasecki M, Atherton PJ. The age-related loss of skeletal muscle mass and function: measurement and physiology of muscle fibre atrophy and muscle fibre loss in humans. *Ageing Res Rev* 2018;47:123–32.
- Mitchell WK, Williams J, Atherton P, *et al.* Sarcopenia, dynapenia, and the impact of advancing age on human skeletal muscle size and strength; a quantitative review. *Front Physiol* 2012;3:260.
- Marzetti E, Calvani R, Tosato M, *et al.* Sarcopenia: an overview. *Ageing Clin Exp Res* 2017;29:11–17.
- Jaitovich A, Barreiro E. Skeletal muscle dysfunction in chronic obstructive pulmonary disease. what we know and can do for our patients. *Am J Respir Crit Care Med* 2018;198:175–86.
- Benz E, Trajanoska K, Lahousse L, *et al.* Sarcopenia in COPD: a systematic review and meta-analysis. *Eur Respir Rev* 2019;28. doi:10.1183/16000617.0049-2019. [Epub ahead of print: 31 Dec 2019].
- Maddocks M, Kon SSC, Canavan JL, *et al.* Physical frailty and pulmonary rehabilitation in COPD: a prospective cohort study. *Thorax* 2016;71:988–95.
- Jones SE, Maddocks M, Kon SSC, *et al.* Sarcopenia in COPD: prevalence, clinical correlates and response to pulmonary rehabilitation. *Thorax* 2015;70:213–8.
- van den Borst B, Koster A, Yu B, *et al.* Is age-related decline in lean mass and physical function accelerated by obstructive lung disease or smoking? *Thorax* 2011;66:961–9.
- Spruit MA, Gosselink R, Troosters T, *et al.* Muscle force during an acute exacerbation in hospitalised patients with COPD and its relationship with CXCL8 and IGF-I. *Thorax* 2003;58:752–6.
- Pitta F, Troosters T, Probst VS, *et al.* Physical activity and hospitalization for exacerbation of COPD. *Chest* 2006;129:536–44.
- Hopkinson NS, Tennant RC, Dayer MJ, *et al.* A prospective study of decline in fat free mass and skeletal muscle strength in chronic obstructive pulmonary disease. *Respir Res* 2007;8:25.
- McDonald M-LN, Diaz AA, Rutten E, *et al.* Chest computed tomography-derived low fat-free mass index and mortality in COPD. *Eur Respir J* 2017;50. doi:10.1183/13993003.01134-2017. [Epub ahead of print: 14 Dec 2017].
- Marquis K, Debigaré R, Lacasse Y, *et al.* Mid-thigh muscle cross-sectional area is a better predictor of mortality than body mass index in patients with chronic obstructive pulmonary disease. *Am J Respir Crit Care Med* 2002;166:809–13.
- Vestbo J, Prescott E, Almdal T, *et al.* Body mass, fat-free body mass, and prognosis in patients with chronic obstructive pulmonary disease from a random population sample: findings from the Copenhagen City heart study. *Am J Respir Crit Care Med* 2006;173:79–83.
- Tanimura K, Sato S, Fuseya Y, *et al.* Quantitative assessment of erector spinae muscles in patients with chronic obstructive pulmonary disease. novel chest computed Tomography-derived index for prognosis. *Ann Am Thorac Soc* 2016;13:334–41.
- McDonald M-LN, Diaz AA, Ross JC, *et al.* Quantitative computed tomography measures of pectoralis muscle area and disease severity in chronic obstructive pulmonary disease. A cross-sectional study. *Ann Am Thorac Soc* 2014;11:326–34.
- Vestbo J, Anderson W, Coxson HO, *et al.* Evaluation of COPD longitudinally to identify predictive surrogate end-points (eclipse). *Eur Respir J* 2008;31:869–73.
- Regan EA, Hokanson JE, Murphy JR, *et al.* Genetic epidemiology of COPD (COPDGene) study design. *COPD* 2010;7:32–43.
- Stewart JI, Moyle S, Criner GJ, *et al.* Automated telecommunication to obtain longitudinal follow-up in a multicenter cross-sectional COPD study. *COPD* 2012;9:466–72.
- Rabe KF, Hurd S, Anzueto A, *et al.* Global strategy for the diagnosis, management, and prevention of chronic obstructive pulmonary disease: gold executive summary. *Am J Respir Crit Care Med* 2007;176:532–55.
- ATS Committee on Proficiency Standards for Clinical Pulmonary Function Laboratories. Ats statement: guidelines for the six-minute walk test. *Am J Respir Crit Care Med* 2002;166:111–7.
- Celli B, Tetzlaff K, Criner G, *et al.* The 6-Minute-Walk distance test as a chronic obstructive pulmonary disease stratification tool. insights from the COPD biomarker qualification Consortium. *Am J Respir Crit Care Med* 2016;194:1483–93.
- Moreta-Martinez RO, Onieva J, Pascau J. Pectoralis muscle and subcutaneous adipose tissue segmentation on CT images based on convolutional networks. *Int J Comput Assist Radiol Surg* 2017;12:31–3.
- Cano-Espinosa C, Gonzalez G, Washko GR, *et al.* Biomarker localization from deep learning regression networks. *IEEE Trans Med Imaging* 2020;39:2121–32.
- Kuznetsova A, Brockhoff PB, Christensen RHB. lmerTest package: tests in linear mixed effects models. *J Stat Softw* 2017;82:26.
- Maltais F, Decramer M, Casaburi R, *et al.* An official American thoracic Society/European respiratory Society statement: update on limb muscle dysfunction in chronic obstructive pulmonary disease. *Am J Respir Crit Care Med* 2014;189:e15–62.
- Spruit MA, Singh SJ, Garvey C, *et al.* An official American thoracic Society/European respiratory Society statement: key concepts and advances in pulmonary rehabilitation. *Am J Respir Crit Care Med* 2013;188:e13–64.
- Spruit MA, Pitta F, McAuley E, *et al.* Pulmonary rehabilitation and physical activity in patients with chronic obstructive pulmonary disease. *Am J Respir Crit Care Med* 2015;192:924–33.
- Yoshimura Y, Wakabayashi H, Yamada M, *et al.* Interventions for treating sarcopenia: a systematic review and meta-analysis of randomized controlled studies. *J Am Med Dir Assoc* 2017;18:553.e1–553.e16.
- De Brandt J, Spruit MA, Hansen D, *et al.* Changes in lower limb muscle function and muscle mass following exercise-based interventions in patients with chronic obstructive pulmonary disease: a review of the English-language literature. *Chron Respir Dis* 2018;15:182–219.
- Ryrsø CK, Godtfredsen NS, Kofod LM, *et al.* Lower mortality after early supervised pulmonary rehabilitation following COPD-exacerbations: a systematic review and meta-analysis. *BMC Pulm Med* 2018;18:154.
- Lindenauer PK, Stefan MS, Pekow PS, *et al.* Association between initiation of pulmonary rehabilitation after hospitalization for COPD and 1-year survival among Medicare beneficiaries. *JAMA* 2020;323:1813–23.
- Puhan MA, Gimeno-Santos E, Cates CJ, *et al.* Pulmonary rehabilitation following exacerbations of chronic obstructive pulmonary disease. *Cochrane Database Syst Rev* 2016;12:CD005305.
- Gosselink R, Troosters T, Decramer M. Distribution of muscle weakness in patients with stable chronic obstructive pulmonary disease. *J Cardiopulm Rehabil* 2000;20:353–60.
- Diaz AA, Martinez CH, Harmouche R, *et al.* Pectoralis muscle area and mortality in smokers without airflow obstruction. *Respir Res* 2018;19:62.
- Celis-Morales CA, Welsh P, Lyall DM, *et al.* Associations of grip strength with cardiovascular, respiratory, and cancer outcomes and all cause mortality: prospective cohort study of half a million UK Biobank participants. *BMJ* 2018;361:k1651.
- Massierer D, Alsowayan W, Lima VP, *et al.* Prognostic value of simple measures of physical function and muscle strength in COPD: a systematic review. *Respir Med* 2020;161:105856.
- McDonald M-LN, Wouters EFM, Rutten E, *et al.* It's more than low BMI: prevalence of cachexia and associated mortality in COPD. *Respir Res* 2019;20:100.
- Rutten EPA, Spruit MA, McDonald M-LN, *et al.* Continuous fat-free mass decline in COPD: fact or fiction? *Eur Respir J* 2015;46:1496–8.
- Dransfield MT, Kunisaki KM, Strand MJ, *et al.* Acute exacerbations and lung function loss in smokers with and without chronic obstructive pulmonary disease. *Am J Respir Crit Care Med* 2017;195:324–30.



## **Online Data Supplement**

**Title:** Respiratory exacerbations are associated with muscle loss in current and former smokers

**Authors:** Stefanie E Mason MD<sup>1</sup>, Rafael Moreta-Martinez MS<sup>2</sup>, Wassim W Labaki MD MS<sup>3</sup>, Matthew J Strand PhD<sup>4</sup>, David Baraghishi MStat<sup>4</sup>, Elizabeth A Regan MD PhD<sup>5</sup>, Jessica Bon MD MS<sup>6</sup>, Ruben San Jose Estepar MS<sup>2</sup>, Richard Casaburi PhD MD<sup>7</sup>, Merry-Lynn McDonald PhD<sup>8</sup>, Harry B Rossiter PhD<sup>7</sup>, Barry Make MD<sup>9</sup>, Mark T Dransfield MD<sup>8</sup>, MeiLan K Han MD MS<sup>3</sup>, Kendra Young PhD<sup>10</sup>, Greg Kinney PhD<sup>10</sup>, John E Hokanson PhD<sup>10</sup>, Raul San Jose Estepar PhD<sup>2</sup>, George R Washko MD<sup>1</sup> for the COPDGene® Investigators.

### **Affiliations:**

<sup>1</sup> Department of Medicine, Division of Pulmonary and Critical Care, Brigham and Women's Hospital, Boston MA

<sup>2</sup> Department of Radiology, Brigham and Women's Hospital, Boston MA

<sup>3</sup> Department of Medicine, Division of Pulmonary and Critical Care, University of Michigan, Ann Arbor MI

<sup>4</sup> Division of Biostatistics and Bioinformatics, National Jewish Health, Denver CO

<sup>5</sup> Department of Medicine, Division of Rheumatology, National Jewish Health, Denver CO

<sup>6</sup> Department of Medicine, Division of Pulmonary, Allergy and Critical Care, Pittsburgh PA

<sup>7</sup> Rehabilitation Clinical Trials Center, Los Angeles Biomedical Research Institute at Harbor-UCLA Medical Center, Torrance CA

<sup>8</sup> Department of Medicine, Division of Pulmonary, Allergy, and Critical Care, University of Alabama at Birmingham, Birmingham AL

<sup>9</sup> Department of Medicine, Division of Pulmonary, Critical Care, and Sleep Medicine, National Jewish Health, Denver CO

<sup>10</sup> Department of Epidemiology, Colorado School of Public Health, Aurora CO

### **Corresponding author:**

Stefanie Mason, MD                      smason8@bwh.harvard.edu  
15 Francis St                              ph 805.368.0683  
Boston, MA 02115                        fax 617.582.6102

### **Page    Contents**

|   |                                                                                |
|---|--------------------------------------------------------------------------------|
| 2 | Table E1. Expanded baseline demographics by presence or absence of COPD.       |
| 2 | Table E2. Expanded summary of exacerbation data, by Gold stage.                |
| 3 | Analysis with an expanded cohort                                               |
| 3 | Table E3. Characteristics of the expanded analysis cohort.                     |
| 4 | Figure E1. Comparison of effect estimates for the primary and expanded cohorts |
| 5 | Table E4: Ethics Review Boards: ECLIPSE                                        |
| 9 | Table E5: Ethics Review Boards: COPDGene                                       |

**Table E1. Expanded baseline demographics by presence or absence of COPD.**

|                                       | ECLIPSE       |                  | COPDGene      |                  |
|---------------------------------------|---------------|------------------|---------------|------------------|
|                                       | At-risk       | GOLD stage II-IV | At-risk       | GOLD stage II-IV |
| Sample size                           | 226           | 1106             | 2,976         | 1,387            |
| Age, years                            | 55.0 (8.7)    | 63.2 (6.9)       | 58.4 (8.5)    | 62.9 (8.1)       |
| Male                                  | 126 (55.8)    | 721 (65.2)       | 1,444 (48.5)  | 759 (54.7)       |
| Caucasian                             | 220 (97.3)    | 1082 (97.8)      | 2,006 (67.4)  | 1,082 (78.0)     |
| Current smoker                        | 134 (59.3)    | 378 (34.2)       | 1535 (51.6)   | 569 (41.0)       |
| Pack years at study entry             | 32.4 (24.4)   | 48.6 (27.3)      | 39.0 (21.6)   | 51.0 (26.0)      |
| BMI                                   | 26.7 (4.3)    | 26.5 (5.3)       | 28.3 (5.9)    | 28.6 (5.8)       |
| Chronic oral steroid use              | 0.0 (0.0)     | 0.0 (0.0)        | 22 (0.7)      | 42 (3.0)         |
| Pectoral muscle area, cm <sup>2</sup> | 42.61 (13.25) | 34.96 (9.85)     | 42.60 (16.01) | 38.43 (13.18)    |
| 6-minute walk distance, m             | --            | 386.4 (118.3)    | 455.0 (108.3) | 391.3 (110.9)    |

**Table E2. Expanded summary of exacerbation data, by Gold stage.**

| Sample size                              | ECLIPSE <sup>a</sup> |        |        |        | COPDGene <sup>b</sup> |        |        |        |
|------------------------------------------|----------------------|--------|--------|--------|-----------------------|--------|--------|--------|
|                                          | At-risk              | GOLD 2 | GOLD 3 | GOLD 4 | At-risk               | GOLD 2 | GOLD 3 | GOLD 4 |
| <b>Baseline exacerbation history</b>     | 226                  | 516    | 460    | 130    | 2976                  | 866    | 421    | 100    |
| % with an event in past year             | 5.8                  | 44.8   | 59.8   | 71.5   | 13.1                  | 30.5   | 43.7   | 57.0   |
| Mean rate, per year                      | 0.09                 | 0.92   | 1.19   | 1.52   | 0.20                  | 0.50   | 0.74   | 1.09   |
| % with a severe event in past year       | 0.0                  | 12.8   | 20.4   | 33.8   | 2.4                   | 6.0    | 13.1   | 21.0   |
| Mean severe rate, per year               | 0.0                  | 0.25   | 0.31   | 0.50   | 0.03                  | 0.08   | 0.17   | 0.27   |
| <b>Intercurrent exacerbation history</b> |                      |        |        |        |                       |        |        |        |
| % with an event during follow-up         | 0.0                  | 62.4   | 77.2   | 83.8   | 29.6                  | 53.1   | 75.3   | 81.0   |
| % ≥ 1 event per year                     | 0.0                  | 39.9   | 56.5   | 69.2   | 7.0                   | 16.4   | 28.7   | 37.0   |
| Mean rate, per year                      | 0.00                 | 0.85   | 1.28   | 1.79   | 0.21                  | 0.45   | 0.78   | 0.94   |
| % with a severe event during follow-up   | 0.0                  | 15.1   | 31.3   | 46.9   | 11.0                  | 24.8   | 40.1   | 45.0   |
| % ≥1 severe event per year               | 0.0                  | 3.7    | 11.5   | 23.8   | 1.6                   | 2.9    | 5.7    | 10.0   |
| Mean severe rate, per year               | 0.00                 | 0.11   | 0.28   | 0.53   | 0.06                  | 0.12   | 0.23   | 0.27   |

<sup>a</sup> N=2 subjects in ECLIPSE did not have GOLD stage data.

<sup>b</sup> N=21 subjects in COPDGene did not have GOLD stage data.

### **Analysis with an expanded cohort**

As with any longitudinal study, loss to follow-up may introduce bias into the effect estimates. Fully addressing missing data is challenging with only two time-points, as no information can be inferred on progression for those with only one visit. Our primary analysis using only patients who completed two visits implicitly assumes subjects lost to follow-up are missing completely at random (MCAR), which implies that none of the observed (or unobserved) variables impacted their continued participation. In contrast, an analysis using partial data assumes only missing at random (MAR), which allows their loss to follow-up to be related to the observed data (but not the missing data). If the analysis correctly adjusts for the conditional variable(s), unbiased estimates are possible.

For the expanded analysis, 3,562 visits (2,224 unique patients) from ECLIPSE and 13,857 visits (9,473 unique patients) from COPDGene had complete data available. Baseline clinical characteristics of the cohorts are shown in Table E3. As would be expected, there were more baseline visits with complete data than follow-up visits in both studies.

Effect estimates for the excess loss of PMA per annual exacerbation were lower in the expanded cohort than in the primary analysis, however all of them remained statistically significant (Figure E1). While these results are re-assuring, they do not eliminate the potential for bias if the missingness is not random. For example, patients who died or who became too sick to attend their study visits would potentially introduce survivor bias. If these patients had frequent exacerbations but preserved muscle mass or few exacerbations with accelerated muscle loss, their exclusion would make the association demonstrated in this study appear stronger than it is.

We also repeated the analysis using inverse probability weighting (IPW), which is different method to assess the impact of missingness. Specifically, the probability of missingness was modeled as a function of key predictors, leading to the construction of weights that were then used in the pectoral muscle area (PMA) model to essentially give dropouts higher weighting, with the aim to reduce bias in estimates caused by missing data. Logistic regression was used to model data presence (1=yes, 0=no) as a function of phase (baseline or follow-up), exacerbation rate, age, BMI, race, smoking status, and 2-way interactions between phase and the other variables. From this model fit, the probability of data presence was determined for each subject and phase, and weights were then calculated as the inverse of these probabilities. In the model fit for PMA, the weights were applied to records, resulting in an up-weighting of records when the probability of missingness was greater and a down-weighting of records association with lower probability of missingness. In order to have the weights have the desired impact, correlation was not modeled and empirical standard errors were used (Fitzmaurice et al, Applied Longitudinal Analysis 2<sup>nd</sup> edition, 2011).

As might be expected, small compositional cohort differences in the missing subjects increased the impact of those variables in the IPW model. For example, there are more current smokers in the excluded cohort and the effect of smoking went from a 1% effect on pectoral muscle area under the complete case analysis to a 10% effect in the IPW analysis. The estimated coefficients describing the association with exacerbations; however, were not changed greatly relative to the estimates presented in the primary analysis. Specifically, for the primary analysis, the estimated excess PMA loss for subjects experiencing one exacerbation per year remained 2.1% after applying the IPW methods.



**Table E3. Characteristics of the expanded analysis cohort.**

|                                         | ECLIPSE                   |                                | COPDGene                  |                                |
|-----------------------------------------|---------------------------|--------------------------------|---------------------------|--------------------------------|
|                                         | Expanded cohort           | Excluded from primary analysis | Expanded cohort           | Excluded from primary analysis |
| Total visits                            | 3,562                     | 898                            | 13,857                    | 5,089                          |
| Baseline                                | 2,067                     | 735                            | 9,091                     | 4,707                          |
| Follow-up                               | 1,495                     | 163                            | 4,766                     | 382                            |
| Deaths prior to follow-up               | 172                       | 172                            | 1,198                     | 1,198                          |
| Age, years                              | 63.1 (8.1)                | 62.6 (8.5)                     | 61.5 (9.3)                | 59.7 (9.4)                     |
| Male                                    | 1,368 (61.5) <sup>a</sup> | 524 (58.4)                     | 5,108 (53.9) <sup>a</sup> | 2894 (56.9)                    |
| Caucasian                               | 2,168 (97.5) <sup>a</sup> | 872 (97.1)                     | 6,318 (66.7) <sup>a</sup> | 3,225 (63.4)                   |
| Current smoker                          | 1,339 (37.6)              | 315 (35.2)                     | 6,676 (48.2)              | 2832 (55.6)                    |
| Pack years on study entry               | 43.9 (28.3) <sup>a</sup>  | 40.8 (29.4)                    | 44.13 (24.7) <sup>a</sup> | 45.3 (25.4)                    |
| BMI                                     | 26.5 (5.4)                | 26.8 (6.0)                     | 28.9 (6.2)                | 28.6 (6.4)                     |
| Chronic oral steroid use                | 69 (1.9)                  | 16 (1.8)                       | 310 (2.2)                 | 172 (3.4)                      |
| Pectoral muscle area, cm <sup>2</sup>   | 35.7 (11.2)               | 36.0 (11.8)                    | 41.0 (15.7)               | 42.6 (16.8)                    |
| 6-minute walk distance <sup>b</sup> , m | 370.1 (126.2)             | 334.3 (120.4)                  | 406.5 (125.0)             | 391.9 (125.9)                  |
| BODE score <sup>c</sup>                 | 3.2 (2.1)                 | 3.7 (2.2)                      | 1.8 (2.2)                 | 2.2 (2.5)                      |
| Pulmonary rehabilitation                | --                        | --                             | 370 (3.9) <sup>d</sup>    | 97 (7.8)                       |

<sup>a</sup> these time-independent covariates are expressed as a function of unique patients. The time-varying covariates use the total number of visits as the denominator.

<sup>b</sup> 6MW data available for n=2,732 visits in ECLIPSE and n= 13,667 visits in COPDGene.

<sup>c</sup> BODE data available for n=2,654 visits in ECLIPSE and n=13,458 visits in COPDGene

<sup>d</sup> No pulmonary rehabilitation data is available for ECLIPSE subjects.

**Figure E1. Comparison of effect estimates for the primary and expanded cohorts.**

The dot represents the effect estimate for excess percent muscle loss and the whiskers correspond to the 95% confidence interval. The primary cohort is comprised of the 1,332 participants from ECLIPSE and the 4,384 participants in COPDGene who had complete data for the baseline and 3- or 5-year follow-up visit, respectively. The expanded cohort includes an additional 898 visits from ECLIPSE and 5,089 visits from COPDGene representing participants who had complete data at only one of the two time-points.

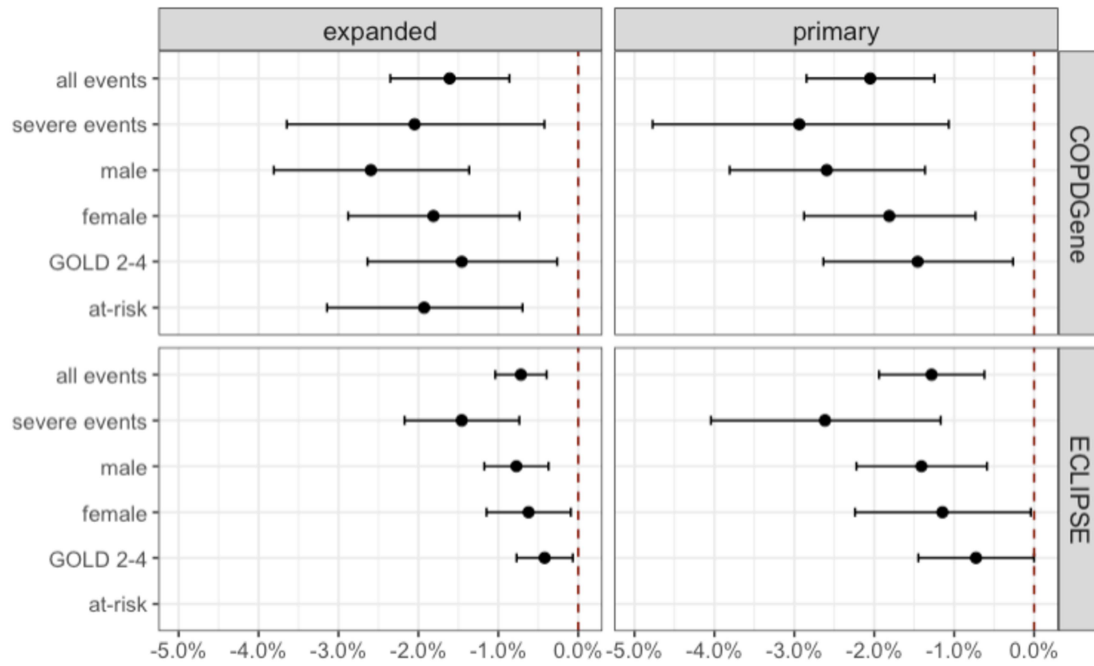

Table E4: Ethics Review Boards: ECLIPSE

| Inv/Site No.   | Institution & Address                                                                                                                             | IEC/IRB Committee                                                                                                                                                              |
|----------------|---------------------------------------------------------------------------------------------------------------------------------------------------|--------------------------------------------------------------------------------------------------------------------------------------------------------------------------------|
| 027904/023622  | Asthma Centre<br>Ivan Vazov Street Nr 31<br>PO Box 1018<br>Pleven, 5800 Bulgaria                                                                  | Ethics Committee for Multicentre Trials<br>8, Damyan Gruev str.,<br>Sofia 1303<br>Bulgaria                                                                                     |
| 076209/023623  | Military Medical Academy<br>Georgi Sofiiski 3 str<br>Sofia 1606 Bulgaria                                                                          | Ethics Committee for Multicentre Trials<br>8, Damyan Gruev str.,<br>Sofia 1303<br>Bulgaria                                                                                     |
| 006269/023794  | Montreal Chest Institute<br>3650 St-Urbain, Room K307<br>Montreal, QC H2X 2P4 Canada                                                              | McGill University Health Center<br>Research Ethics Board<br>3650 St Urbain<br>Montreal, QC H2X 2P4                                                                             |
| 006610/023668  | The Lung Center<br>2775 Laurel St., 7 <sup>th</sup> Floor<br>Vancouver, BC V5Z 1M9 Canada                                                         | The University of British Columbia<br>Office of Research Services Clinical Research<br>Ethics Board<br>Room210, 828 West 10 <sup>th</sup> Ave<br>Vancouver, BC V5Z 1L8 Canada  |
| 004970/023483  | Queen Elizabeth II Health Sciences Centre<br>Halifax Infirmary<br>1796 Summer St., Room 5452<br>Halifax, NS B3H 3A7 Canada                        | Capital Health Research Ethics Board<br>Centre for Clinical Research Building<br>118-5790 University Avenue<br>Halifax, NS B3H 1V7 Canada                                      |
| 029347/023796  | McMaster University, Health Sciences Center<br>1200 Main St. West, Room 3U25<br>Hamilton, ON L8N 3Z5 Canada                                       | Hamilton Health Sciences/Faculty of Health<br>Sciences Research Ethics Board<br>293 Wellington St N,<br>Suite 102<br>Hamilton, Ontario L8L 8E7<br>Canada                       |
| 035031/023795  | Pacific Lung Health Center<br>1081 Burrard Street<br>8B Providence Wing<br>Vancouver, BC V6Z 1Y6 Canada                                           | Office of Research Services (ORS)<br>Providence Health Care Research Institute<br>Room 1125, 11th Floor<br>1190 Hornby Street c/o 1081 Burrard Street<br>Vancouver, BC V6Z 1Y6 |
| 006193/023547  | Hopital Laval, Recherche Clinic<br>Centre de Pneumologie<br>2725 Chemin Sainte Foy<br>Pavillion U, Locale U 1751<br>Sainte Foy, QC G1V 4G5 Canada | Comité d'éthique de la recherche<br>Institut Universitaire de Cardiologie et de<br>Pneumologie de Québec (IUCPQ)<br>2725, chemin Ste-Foy<br>Quebec, Qc<br>Canada<br>G1V 4G5    |
| 004395/02409 4 | Kingston General Hospital<br>Richardson House<br>102 Stuart Street<br>Kingtson, ON K7L 2V6 Canada                                                 | Queens University<br>Office of Research Services<br>Fleming Hall, Jemmett Wing, Room 301<br>Queens University<br>Kingston, ON, Canada                                          |
| 000309/024204  | SPLiN s.r.o.<br>Oddeleni TRN<br>Cimicka 37/446<br>Praha 8 18200 Czech Republic                                                                    | Multicentric Ethics Committee Fakultni<br>nemocnice v Motole<br>V Uvalu 84 Prague 5 ZIP: 150 06<br>Czech Republic                                                              |
| 000683/023960  | H:S Hvidovre Hospital<br>Hjerte-Lungemedicinsk afdeling<br>Kettegaard Alle 30<br>Opgang 1<br>Hvidovre 2650 Denmark                                | Den videnskabetiske komité for region<br>hovedstaden<br>Regionsgaarden<br>Kongensvænge 2<br>3400 Hillerød                                                                      |
| 001687/024403  | Astmacentrum Hornerheide<br>Hornerheide 1<br>Horn 6085 NM Netherlands                                                                             | METC Zuidwest-Holland<br>M.H.H.A. Kirkels-Breukers<br>P.O Box 5011<br>2600 GA Delft<br>The Netherlands                                                                         |



|               |                                                                                                                                                                     |                                                                                                                                                                                                                                                               |
|---------------|---------------------------------------------------------------------------------------------------------------------------------------------------------------------|---------------------------------------------------------------------------------------------------------------------------------------------------------------------------------------------------------------------------------------------------------------|
| 082272/023579 | Haukeland Universitets sykehus<br>Chest department<br>Jonas Liesvei 65<br>Bergen N 5021 Norway                                                                      | Regional Ethic Committee West<br>Haukeland University Hospital, N-5021 Bergen,<br>Norway                                                                                                                                                                      |
| 014566/024144 | P3 Research Bown Hospital<br>Churchill Drive Crofton Downs<br>Wellington 6035 New Zealand                                                                           | c/- Ministry of Health<br>1-3 The Terrace<br>Level 1<br>Wellington<br>6011                                                                                                                                                                                    |
| 136098/024146 | KOPA Golnik<br>Golnik 36<br>4204 Golnik Slovenia                                                                                                                    | The National Medical Ethics Committee of the<br>Republic of Slovenia<br>University Institute of Clinical Neurophysiology,<br>Medical Center Ljubljana,<br>Zaloška c. 7,<br>SI-1525 Ljubljana                                                                  |
| 108244/026658 | Hospital Son Dureta<br>C/ Andrea Doria 55<br>Palma de Mallorca 07014 Spain                                                                                          | Comité ètic d'investigació clínica Illes Balears<br>Conselleria de Salut i Consum<br>Direcció General d'Avaluació i Acreditació<br>Comité Ètic d'Investigació Clínica de les Illes<br>Balears (CEIC-IB)<br>Camí de Jesús, 38 A<br>07011 Palma - Illes Balears |
| 000473/023973 | Aintree University Hospitals NHS Foundation<br>Trust<br>Respiratory Research Department<br>Longmoor Lane, Ward 14a<br>Liverpool L9 7AL United Kingdom               | Oxfordshire REC C<br>2 <sup>nd</sup> Floor, Astral House<br>Chaucer Business Park<br>Granville Way<br>Bicester OX26 4JT                                                                                                                                       |
| 082424/023706 | Cambridge Institute for Medical Research<br>Department of Medicine<br>Hills Road, Wellcome Trust / MRC Building<br>Cambridge CB2 2XY United Kingdom                 | Oxfordshire REC C<br>2 <sup>nd</sup> Floor, Astral House<br>Chaucer Business Park<br>Granville Way<br>Bicester OX26 4JT                                                                                                                                       |
| 029855/023707 | New Royal Infirmary of Edinburgh<br>Little France Crescent, Old Dalkeith Road<br>51 Little France Crescent<br>Edinburgh Midlothian EH16 4SA<br>United Kingdom       | Oxfordshire REC C<br>2 <sup>nd</sup> Floor, Astral House<br>Chaucer Business Park<br>Granville Way<br>Bicester OX26 4JT                                                                                                                                       |
| 023731/023974 | Wythenshawe Hospital<br>Medicine Evaluation Unit<br>Southmoor Road<br>The Langley Building, North West Lung<br>Research Centre<br>Manchester M23 9LT United Kingdom | Oxfordshire REC C<br>2 <sup>nd</sup> Floor, Astral House<br>Chaucer Business Park<br>Granville Way<br>Bicester OX26 4JT                                                                                                                                       |
| 029742/024037 | The Royal Free Hospital<br>Academic Unit of Respiratory Medicine<br>Pond Street<br>London NW3 2QG United Kingdom                                                    | Oxfordshire REC C<br>2 <sup>nd</sup> Floor, Astral House<br>Chaucer Business Park<br>Granville Way<br>Bicester OX26 4JT                                                                                                                                       |
| 001069/024393 | Institute of Phthisiatry and Pulmonology<br>Department of Pulmonology<br>10, Amosova Str<br>Kiev 03680 Ukraine                                                      |                                                                                                                                                                                                                                                               |
| 001047/024392 | Institute of Phthisiatry and Pulmonology<br>Department of Pulmonology<br>10, Amosova Str<br>Kiev 03680 Ukraine                                                      |                                                                                                                                                                                                                                                               |
| 001071/024362 | Institute of Phthisiatry and Pulmonology<br>Department of Pulmonology<br>10, Amosova Str<br>Kiev 03680 Ukraine                                                      |                                                                                                                                                                                                                                                               |
| 001063/024364 | Donetsk State Medical University<br>Department of Therapy<br>16 Illicha prospect<br>Donetsk 83003 Ukraine                                                           |                                                                                                                                                                                                                                                               |

|                |                                                                                                                                                                                |                                                                                                                                                                          |
|----------------|--------------------------------------------------------------------------------------------------------------------------------------------------------------------------------|--------------------------------------------------------------------------------------------------------------------------------------------------------------------------|
| 044783/023140  | University of Texas Health Science Center<br>Pulmonary Diseases<br>7400 Merton Minter Blvd., (111E)<br>San Antonio, TX 78229 United States                                     | University of Texas Health Science Center<br>7703 Floyd Curl Drive, Mail Code 7830<br>San Antonio, TX 78229-3900                                                         |
| 077534/023146  | Rhode Island Hospital<br>Division of Pulmonary, Sleep & Critical Care<br>Medicine<br>593 Eddy Street, APC 7 <sup>th</sup> Floor<br>Providence, RI 02903 United States          | Lifespan Office of Research Administration<br>167 Point Street<br>Providence, RI 02903                                                                                   |
| 013075/023147  | Los Angeles Biomedical Research Institute at<br>Harbor-UCLA Medical Center<br>Rehab Clinical Trials Center<br>1124 W. Carson St., Bldg. J4<br>Torrance, CA 90502 United States | John F. Wolf, MD Human Subjects Committee<br>Los Angeles Biomedical Research Institute at<br>Harbor-UCLA Medical Center<br>1124 West Carson Street<br>Torrance, CA 90502 |
| 008578/023354. | St. Elizabeth's Medical Center<br>Pulmonary STN-3<br>736 Cambridge Street<br>Boston, MA 02135 Unites States                                                                    | Research/Human Subjects Committee<br>Caritas St. Elizabeth's Medical Center<br>Cambridge St., HOQ3<br>Boston, MA 02135                                                   |
| 021992/023148  | Pulmonary Associates of Richmond, Inc.<br>1000 Boulders Parkway, Suite 201<br>Richmond, VA 23225 United States                                                                 | Goodwyn Institution Review Board<br>9380 Main Street<br>Cincinnati, OH 45242                                                                                             |
| 010875/023149  | Pulmonary Associates, PA<br>1112 East McDowell Road<br>Phoenix, AZ 85006 United States                                                                                         | Goodwyn Institution Review Board<br>9380 Main Street<br>Cincinnati, OH 45242                                                                                             |
| 011553/023150  | Advances in Medicine<br>42362 Bob Hope Drive<br>Rancho Mirage, CA 92270 Unites States                                                                                          | Western International Review Board<br>3535 Seventh Ave SW<br>Olympia, WA 98508                                                                                           |
| 010094/023355  | Baylor Clinic-Baylor College of Medicine<br>6620 Main Street<br>Suite 11B, 16<br>Houston, TX 77030 United States                                                               | Baylor College of Medicine IRB<br>Clinical Research Studies<br>One Baylor Plaza, Mail stop 600D<br>Houston, TX 77030                                                     |
| 015497/023356  | Dartmouth-Hitchcock Medical Center<br>Pulmonary & Critical Care Center<br>One Medical Center Drive<br>Lebanon, NH 03756 Unites States                                          | Dartmouth-Hitchcock Medical Center<br>Committee for the Protection of Human<br>Subjects<br>11 Rope Ferry Road #6210<br>Hanover, NH 03755                                 |
| 008005/023357  | National Jewish Medical & Research Center<br>Weinberg Clinical Research Unit<br>1400 Jackson Street<br>Denver, CO 80206 United States                                          | National Jewish Medical & Research Center<br>IRB<br>1400 Jackson Street<br>Denver, CO 80206                                                                              |
| 009021/023358  | University of Nebraska Medical Center<br>Pulmonary Clinical Studies Unit<br>982465 Nebraska Medical Center<br>DRC II1022<br>Omaha, NE 68198 United States                      | University of Nebraska Medical Center IRB<br>Academic & Research Services Bldg. 3000<br>987830 Nebraska Medical Center<br>Omaha, NE 68198                                |
| 083482/023571  | Yale University School of Medicine<br>Internal Medicine/Pulmonary<br>1 Gilbert Street, TAC S 441<br>New Haven, CT 06520 United States                                          | Yale University School of Medicine<br>Human Investigation Committee<br>47 College Street, Suite 204<br>New Haven, CT 06520                                               |
| 015449/023359  | Mayo Clinic<br>Pulmonary Clinical Research Center<br>Lanmark 2-46<br>14 - 2 <sup>nd</sup> Street SW<br>Rochester, MN 55905 United States                                       | Mayo Foundation IRB<br>201 Building, Room 4-60<br>200 First Street SW<br>Rochester, MN 55905                                                                             |
| 080801/023389  | Creighton University Medical Center<br>Pulmonary & Critical Care Division<br>601 N. 30 <sup>th</sup> Street, Suite 3820<br>Omaha, NE 68131 United States                       | Creighton University Medical Center IRB<br>2500 California Plaza<br>Omaha, NE 68178                                                                                      |

|               |                                                                                                                                                     |                                                                                                                                            |
|---------------|-----------------------------------------------------------------------------------------------------------------------------------------------------|--------------------------------------------------------------------------------------------------------------------------------------------|
| 010532/023489 | University of Pittsburgh Medical Center<br>Emphysema Research Center<br>3471 5 <sup>th</sup> Ave., Suite 1211<br>Pittsburgh, PA 15213 United States | University of Pittsburgh IRB<br>3500 Fifth Ave, Ground Level<br>Pittsburgh, PA 15213                                                       |
| 021093/023390 | Houston VA Medical Center<br>2002 Holcombe Blvd.<br>Pulmonary 111-1, Room 3C-220<br>Houston, TX 77030 United States                                 | Baylor College of Medicine IRB<br>Clinical Research Studies<br>One Baylor Plaza, Mail stop 600D<br>Houston, TX 77030                       |
| 008864/023392 | Midwest Chest Consultants, PC<br>330 First Capital Drive, Suite 470<br>St. Charles, MO 63301 United States                                          | Goodwyn Institution Review Board<br>9380 Main Street<br>Cincinnati, OH 45242                                                               |
| 077533/023391 | Harvard University-Brigham & Women's<br>Hospital<br>Channing Laboratory<br>181 Longwood Ave.<br>Boston, MA 02115 United States                      | Brigham & Women's Hospital IRB<br>Partners Human Research Office<br>116 Huntington Ave, Suite 1002<br>Boston, MA 02116                     |
| 016586/023393 | University of Miami School of Medicine<br>1600 NW 10th Ave, #7064-A (R-47)<br>Miami, FL 33136                                                       | Western International Review Board<br>3535 Seventh Ave SW<br>Olympia, WA 98508                                                             |
| 057745/023394 | Johns Hopkins Asthma & Allergy Center<br>5501 Hopkins Bayview Circle, Room 3B-58<br>Baltimore, MD 21224 United States                               | John Hopkins School of Medicine<br>Office of Human Subject Research<br>1620 McElderry St., Reed Hall<br>Suite B 130<br>Baltimore, MD 21205 |
| 012252/023395 | St. Francis Hospital & Medical Center<br>Pulmonary Medicine<br>114 Woodland Street<br>Hartford, CT 06105 United States                              | St. Francis Hospital & Medical Center IRB<br>Department of Research<br>114 Woodland St.<br>Hartford, CT 06105                              |

**Table E5: Ethics Review Boards: COPDGene**

| Clinical Center                                           | Institution Title                                                                                                          | Protocol Number      |
|-----------------------------------------------------------|----------------------------------------------------------------------------------------------------------------------------|----------------------|
| National Jewish Health                                    | National Jewish IRB                                                                                                        | HS-1883a             |
| Brigham and Women's Hospital                              | Partners Human Research Committee                                                                                          | 2007-P-000554/2; BWH |
| Baylor College of Medicine                                | Institutional Review Board for Baylor College of Medicine and Affiliated Hospitals                                         | H-22209              |
| Michael E. DeBakey VAMC                                   | Institutional Review Board for Baylor College of Medicine and Affiliated Hospitals                                         | H-22202              |
| Columbia University Medical Center                        | Columbia University Medical Center IRB                                                                                     | IRB-AAAC9324         |
| Duke University Medical Center                            | The Duke University Health System Institutional Review Board for Clinical Investigations (DUHS IRB)                        | Pro00004464          |
| Johns Hopkins University                                  | Johns Hopkins Medicine Institutional Review Boards (JHM IRB)                                                               | NA_00011524          |
| Los Angeles Biomedical Research Institute                 | The John F. Wolf, MD Human Subjects Committee of Harbor-UCLA Medical Center                                                | 12756-01             |
| Morehouse School of Medicine                              | Morehouse School of Medicine Institutional Review Board                                                                    | 07-1029              |
| Temple University                                         | Temple University Office for Human Subjects Protections Institutional Review Board                                         | 11369                |
| University of Alabama at Birmingham                       | The University of Alabama at Birmingham Institutional Review Board for Human Use                                           | FO70712014           |
| University of California, San Diego                       | University of California, San Diego Human Research Protections Program                                                     | 070876               |
| University of Iowa                                        | The University of Iowa Human Subjects Office                                                                               | 200710717            |
| Ann Arbor VA                                              | VA Ann Arbor Healthcare System IRB                                                                                         | PCC 2008-110732      |
| University of Minnesota                                   | University of Minnesota Research Subjects' Protection Programs (RSPP)                                                      | 0801M24949           |
| University of Pittsburgh                                  | University of Pittsburgh Institutional Review Board                                                                        | PRO07120059          |
| University of Texas Health Sciences Center at San Antonio | UT Health Science Center San Antonio Institutional Review Board                                                            | HSC20070644H         |
| Health Partners Research Foundation                       | Health Partners Research Foundation Institutional Review Board                                                             | 07-127               |
| University of Michigan                                    | Medical School Institutional Review Board (IRBMED)                                                                         | HUM00014973          |
| Minneapolis VA Medical Center                             | Minneapolis VAMC IRB                                                                                                       | 4128-A               |
| Fallon Clinic                                             | Institutional Review Board/Research Review Committee Saint Vincent Hospital – Fallon Clinic – Fallon Community Health Plan | 1143                 |
